# Supplementary material
Source: PubMed Central journal article supplement (PMC2660777)
Supplement: 0901085106_0901085106SI.pdf [file 0901085106_0901085106SI.pdf]

# Supporting Information

Zhang et al. 10.1073/pnas.0901085106

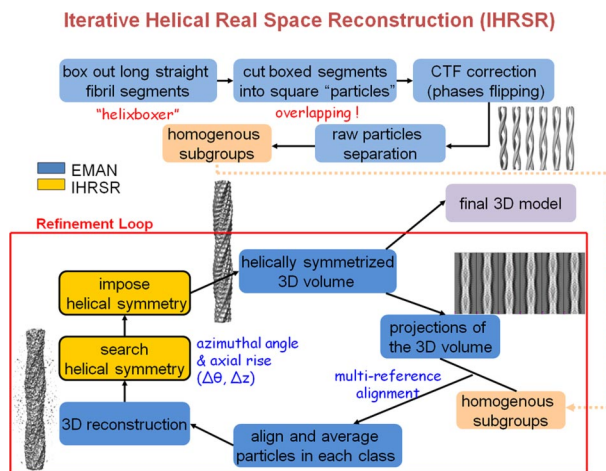

Fig. S1. The pipeline of image reconstruction. The operations in blue and yellow boxes were done by EMAN software and the IHRSR package, respectively.



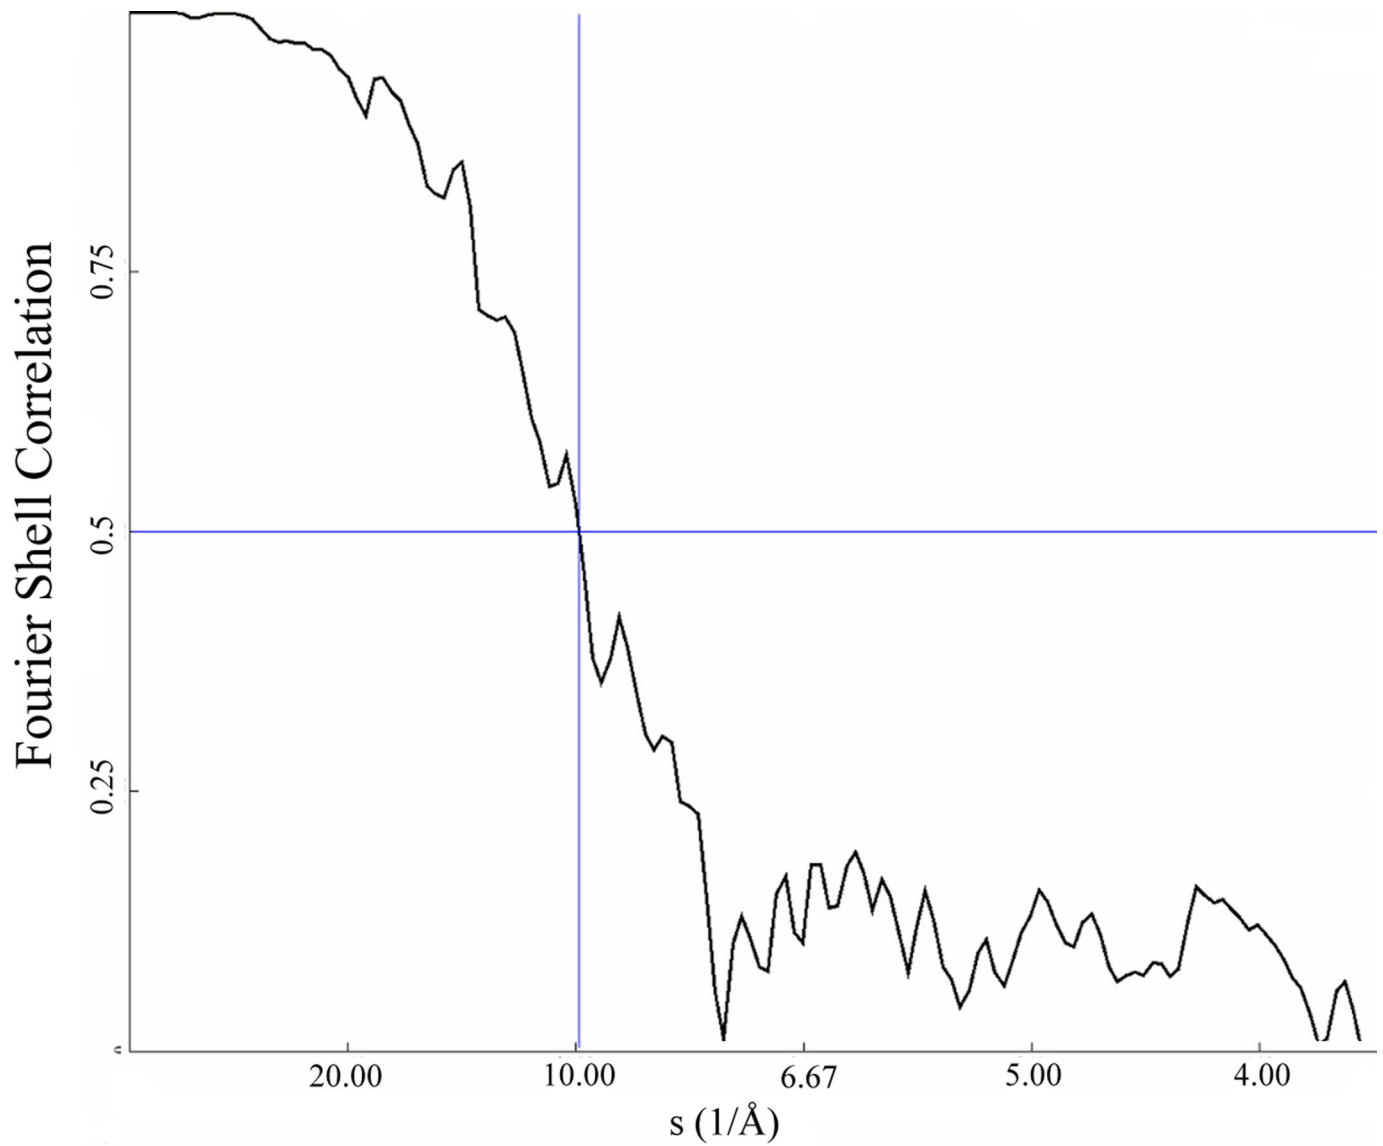

**Fig. S3.** Resolution of the reconstruction. The Fourier shell correlation (FSC) between two independently-reconstructed volumes (obtained by dividing the whole dataset into halves and carrying out two independent reconstruction processes) indicates that the resolution of the reconstruction is  $\approx 10 \text{ \AA}$  when using a 0.5 cutoff.

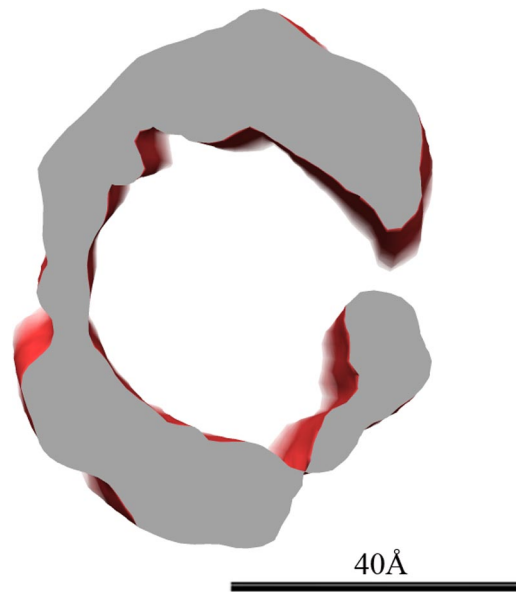

**Fig. S4.** The cross-section of the asymmetric C1 reconstruction after 20 iterations, which suggests a C2 symmetry along the fibril axis.
